# Supplementary material
Source: PubMed Central journal article supplement (PMC2804174)
Supplement: supp_M109.036673_jbc.M109.036673-1.pdf [file supp_M109.036673_jbc.M109.036673-1.pdf]

## ***Supplementary Information***

**SI Fig. 1.** The structures of three monolignols (A), and the schema for the proposed one of electron dehydrogenation and the subsequent oxidative coupling of phenoxy radicals (B).

**SI Fig 2.** Site-directed mutation of the amino-acid residues of COMT (A), and IEMT (B), and the relative activity of the mutant variants on 4-*O*-methylation of coniferyl alcohol. The 100% in A represents the specific activity of 315 pmole mg<sup>-1</sup> min<sup>-1</sup> and in B of 660 pmole mg<sup>-1</sup> min<sup>-1</sup>. The reactions were conducted by using 15 µg purified protein at 30 °C for 30 mins.

**SI Fig. 3.** The procedure of constructing and screening IEMT mutant libraries.

**SI Fig. 4.** MS<sup>n</sup> analysis on the methylated product from the reaction of IEMT mutant incubated with coniferyl alcohol and SAM. (A) The acquired mass spectra of the molecule and the major ions during tandem MS. (B) the proposed fragmentation path of the 4-methoxyconiferyl alcohol.

**SI Fig. 5.** The relationship of the catalytic activity of IEMT mutant on 4-*O*-methylation of monolignol with the hydrophobicity of the substituted amino-acid residues.

(A) Histogram of the catalytic efficiency of the individual single mutants at the sites of 165 and 133, and the hydrophobic values of these substitutions.

\*The hydrophobicity values of the amino acid residues are referred from “Black, S. D., and Mould, D. R. (1991) *Anal. Biochem.* 193, 72-82”.

(B) The active site-binding surface of the IEMT wild-type, single- and double-mutants. 18 amino acid residues constituting the binding surface area in the active site were extracted and calculated using the program GRASP. The areas constituted by the hydrophobic and the acidic amino acids are shown in green and red, respectively. Note the increase of the hydrophobic binding surface of the mutant variants.

**SI Fig. 6.** The mass- and UV-spectra of major oligolignols yielded from the *in vitro* polymerization of coniferyl alcohol.

**SI Table 1.** Primers used for site-directed and site-saturation mutagenesis

| Name                                 | Sequences (5'→3')                                               |
|--------------------------------------|-----------------------------------------------------------------|
| IEMT-130F                            | CTTGCTCCTNNKTTGCTCACGGCTACCGACAA                                |
| IEMT-130R                            | CGTGAGCAAMNNAGGAGCAAGAGAACTCCA                                  |
| IEMT_131F                            | GCTCCTTTTNNKCTCACGGCTACCGACAA                                   |
| IEMT_131R                            | GCCGTGAGMNNAAAAGGAGCAAGAGAACT                                   |
| IEMT-133F                            | TTGCTCNKKGCTACCGACAAGGTCCTTTTGG                                 |
| IEMT-133R                            | GTCGGTAGCMNNGAGCAAAAAAGGAGCAAGAGA                               |
| IEMT-134F                            | GCTCACGNKACCGACAAGGTCCTTTTGG                                    |
| IEMT-134R                            | GTCGGTMNNCGTGAGCAAAAAAGGAGCAAGA                                 |
| IEMT-139F                            | GCT ACC GAC AAG GTC NNK TTG GAG CCC TGG TTT TAC TTG A           |
| IEMT-139R                            | CAA GTA AAA CCA GGG CTC CAA MNN GAC CTT GTC GGT AGC             |
| IEMT-165F                            | TATGGAATGAATNNKTTTCGATTACCATGGAACAGAC CAC                       |
| IEMT-165R                            | TGTTCCATGGTAATCGAAMNNATTCATTCCATACGC                            |
| IEMT-175F                            | CAT GGA ACA GAC CAC AGA NNK AAC AAG GTG TTC AAC A               |
| IEMT-175R                            | TCC CTT GTT GAA CAC CTT GTT MNN TCT GTG GTC TGT                 |
| IEMT-186F                            | C AAG GGA ATG TCC AGC NNK TCT ACC ATC ACC ATG AA                |
| IEMT-186R                            | CAT GGT GAT GGT AGA MNN GCT GGA CAT TCC CTT GTT G               |
| IEMT-319F                            | ACC AAG GTA GTC ATC CAT NNK GAC GCC CTC ATG TTG                 |
| IEMT-319R                            | GGC CAA CAT GAG GGC GTC MNN ATG GAT GAC TAC CTT                 |
| IEMT-326F                            | GCC CTC ATG TTG GCC NNK AAC CCA GGC GGC AAA GAA                 |
| IEMT-326R                            | CCT TTC TTT GCC GCC TGG GTT MNN GGC CAA CAT GAG                 |
| IEMT-327F                            | GCC CTC ATG TTG GCC TAC NNK CCA GGC GGC AAA GAA                 |
| IEMT-327R                            | CCT TTC TTT GCC GCC TGG MNN GTA GGC CAA CAT GAG                 |
| IEMT-F130L-L131C-T133L-F             | CT CTT GCT CCT TTA TGT CTC CTG GCT ACC GAC AAG GT               |
| IEMT-F130L-L131C-T133L-R             | GTC GGT AGC CAG GAG ACA TAA AGG AGC AAG AGA AAC T               |
| IEMT-T133L-A134N-T135Q-F             | GCT CCT TTT TTG CTC CTG AAT CAG GAC AAG GTC CTT TTG GA          |
| IEMT-T133L-A134N-T135Q-R             | CTC CAA AAG GAC CTT GTC CTG ATT CAG GAG CAA AAA AGG A           |
| IEMT-F130L-L131C-T133L-A134N-T135Q-F | GGA GTT TCT CTT GCT CCT TTA TGT CTC CTG AAT CAG GAC AAG GTC CTT |
| IEMT-F130L-L131C-T133L-A134N-T135Q-R | CTC CAA AAG GAC CTT GTC CTG ATT CAG GAG ACA TAA AGG AGC AAG AGA |
| IEMT-E165F-N164T-F                   | C AAT AAA GCG TAT GGA ATG ACT TTT TTC GAT TAC CAT GGA           |
| IEMT-E165F-N164T-R                   | CC ATG GTA ATC GAA AAA AGT CAT TCC ATA CGC TTT A                |

**SI Table 2.** The codon mutations of the selected mutant variants of IEMT

| <b>Mutant</b>            | <b>Represented codon</b>            |
|--------------------------|-------------------------------------|
| L131A                    | TTG>GCG                             |
| L131M                    | TTG>ATG                             |
| L131V                    | TTG>GTG                             |
| T133A                    | ACG>GCG                             |
| T133M                    | ACG>ATG                             |
| T133L                    | ACG>CTG                             |
| E165Y                    | GAA>TAT                             |
| E165S                    | GAA>AGT, TCT                        |
| E165M                    | GAA>ATG                             |
| E165A                    | GAA>GCG/GCT                         |
| E165T                    | GAA>ACT                             |
| E165P                    | GAA>CCG                             |
| E165V                    | GAA>GAG                             |
| E165C                    | GAA>TGT                             |
| E165F                    | GAA>TTT                             |
| E165D                    | GAA>GAT                             |
| E165I                    | GAA>ATA                             |
| E165L                    | GAA>CTA                             |
| T133L-E165F              | ACG>CTG, GAA>TTT                    |
| T133L-E165S              | ACG>CTG, GAA>AGT                    |
| T133L-E165L              | ACG>CTG, GAA>TTG/CTT                |
| T133L-E165Y              | ACG>CTG, GAA>TAT                    |
| T133L-E165M              | ACG>CTG, GAA>ATG                    |
| T133L-E165A              | ACG>CTG, GAA>GCT                    |
| T133L-E165T              | ACG>CTG, GAA>ACT                    |
| T133G-E165F              | ACG>GGG, GAA>TTT                    |
| T133Q-E165F              | ACG>CAG, GAA>TTT                    |
| T133M-E165F              | ACG>ATG, GAA>TTT                    |
| T133L-E165I              | ACG>CTG, GAA>ATA                    |
| T133M-E165I              | ACG>ATG, GAA>ATA                    |
| T133L-E165F-L139Q        | ACG>CTG, GAA>TTT, CTT> CAG          |
| T133L-E165I-F175I        | ACG>CTG, GAA>ATA, TTC>ATT           |
| T133L-E165I-F175I- L139Q | ACG>CTG, GAA>ATA, TTC>ATT, CTT> CAG |

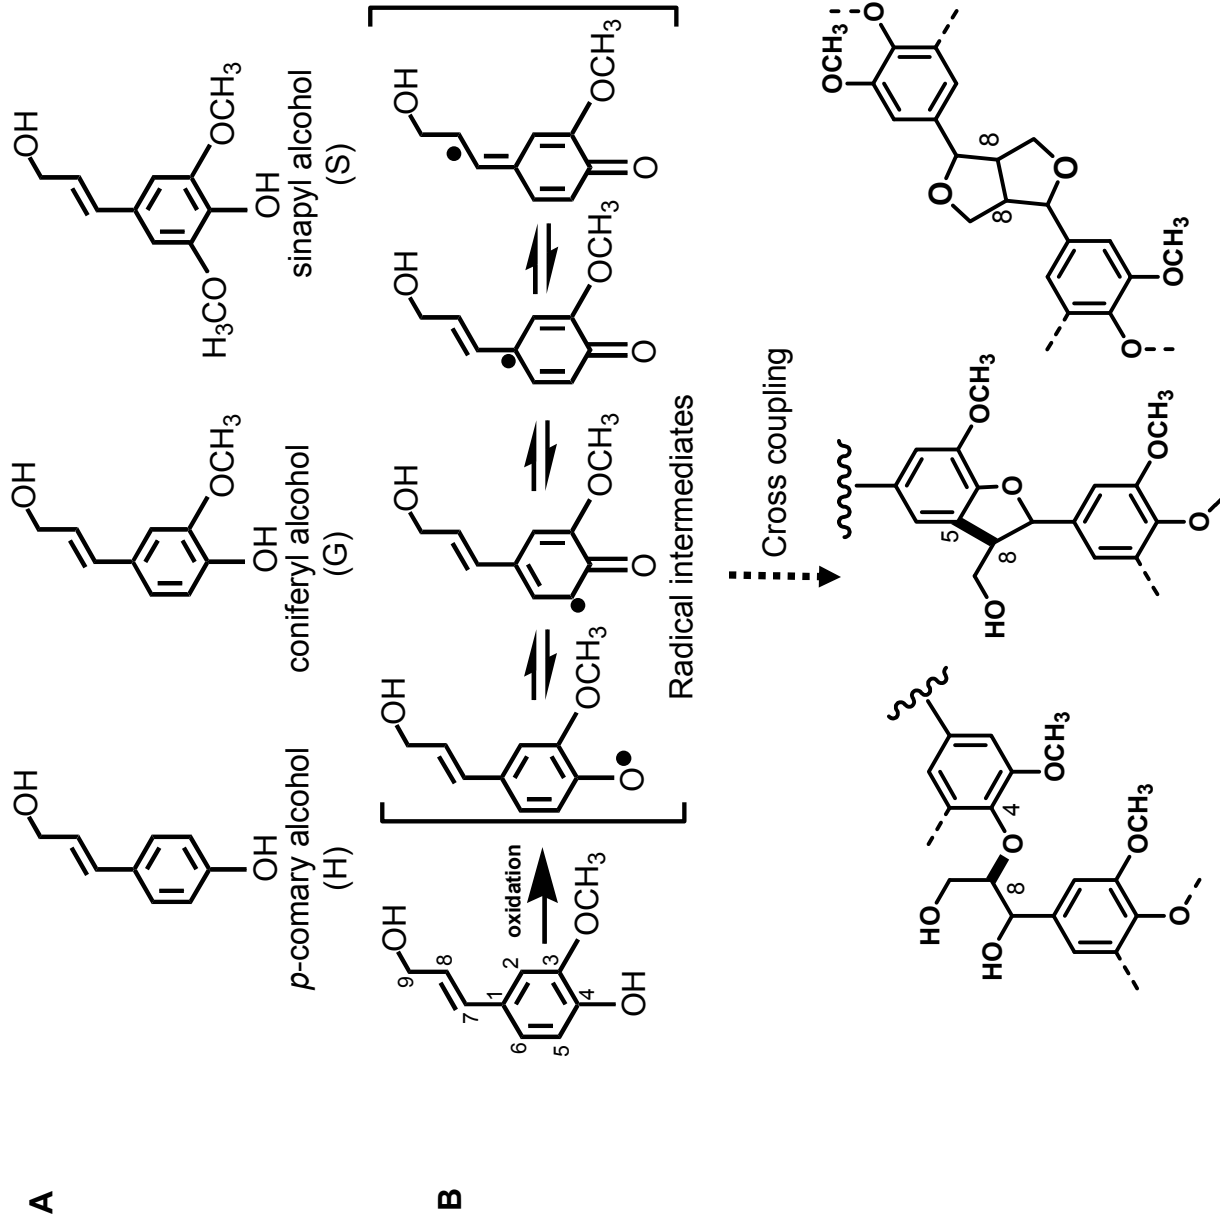

SI Fig. 1

A

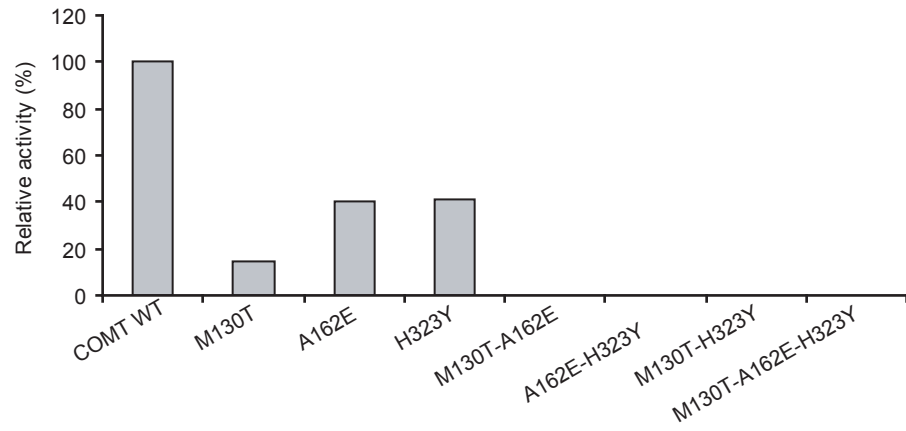

B

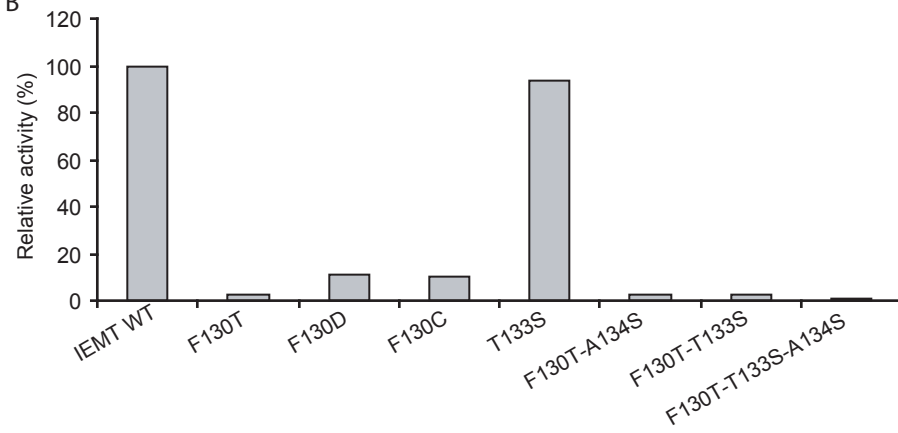

SI Figure 2

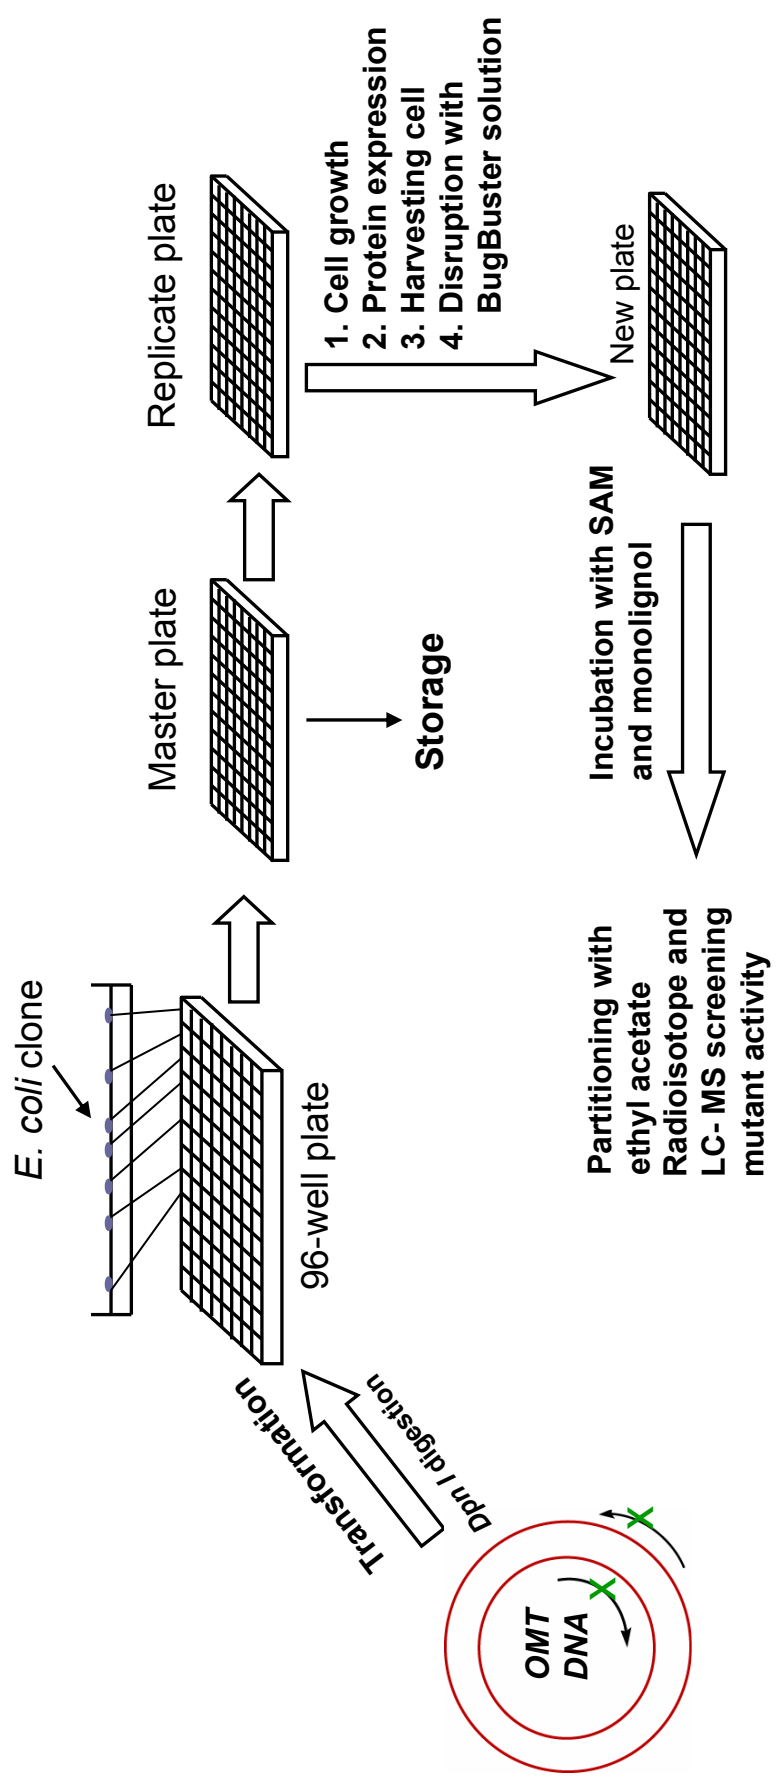

SI Fig. 3

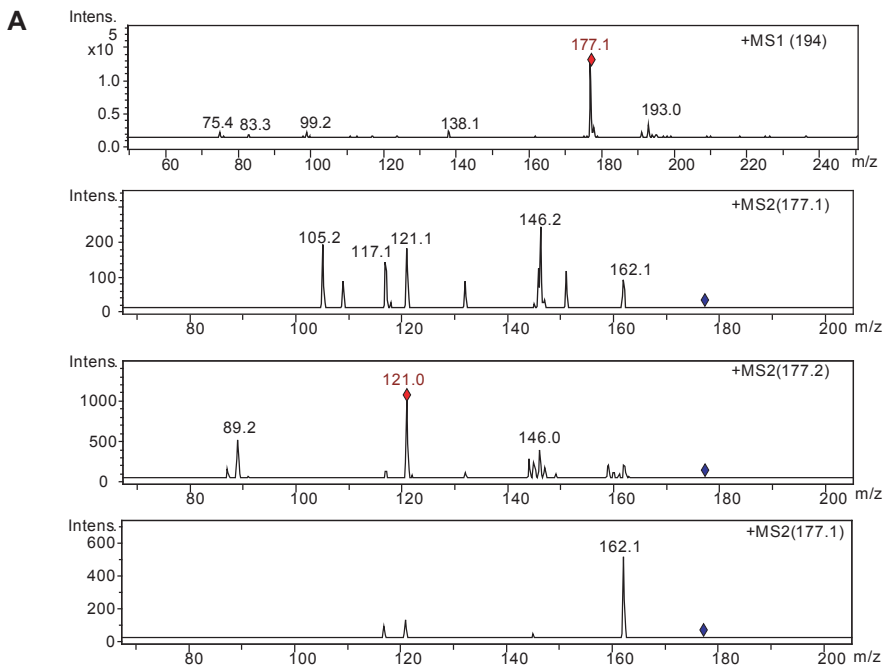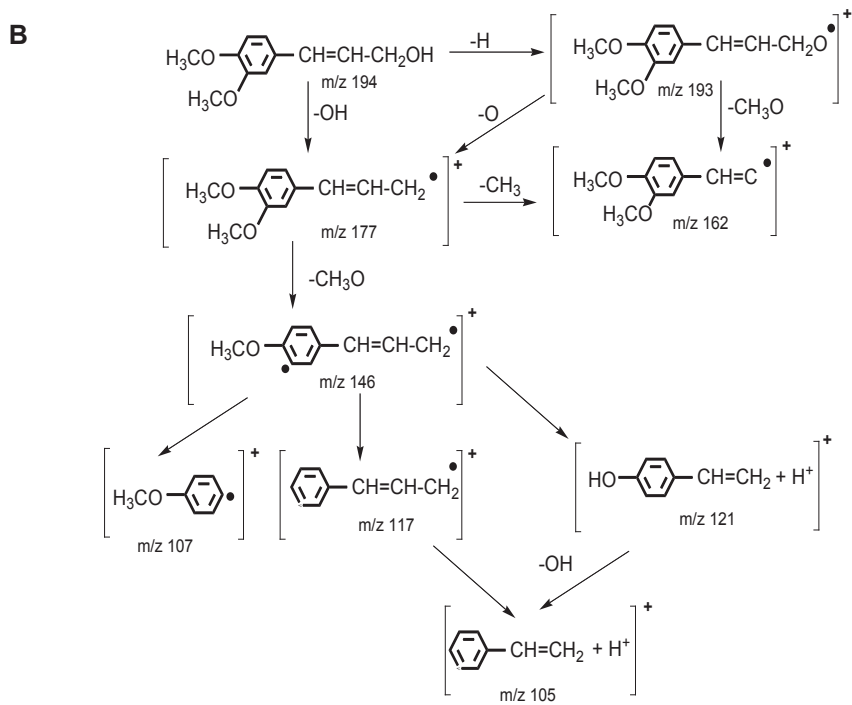

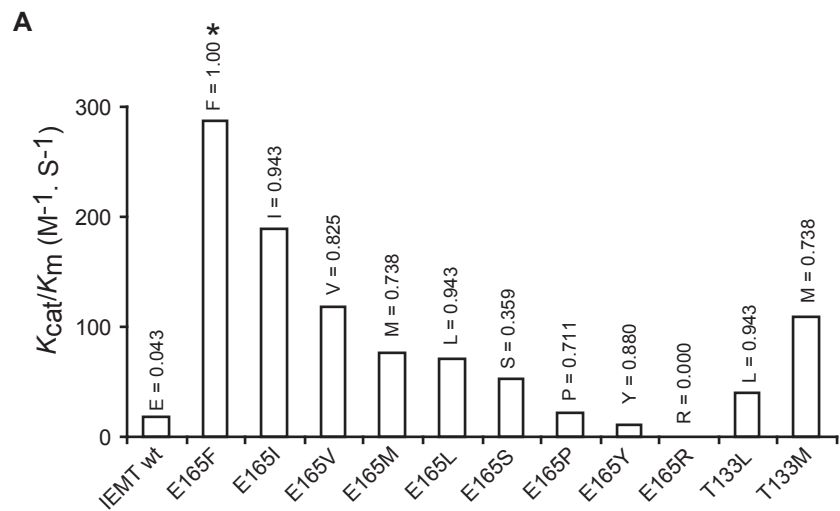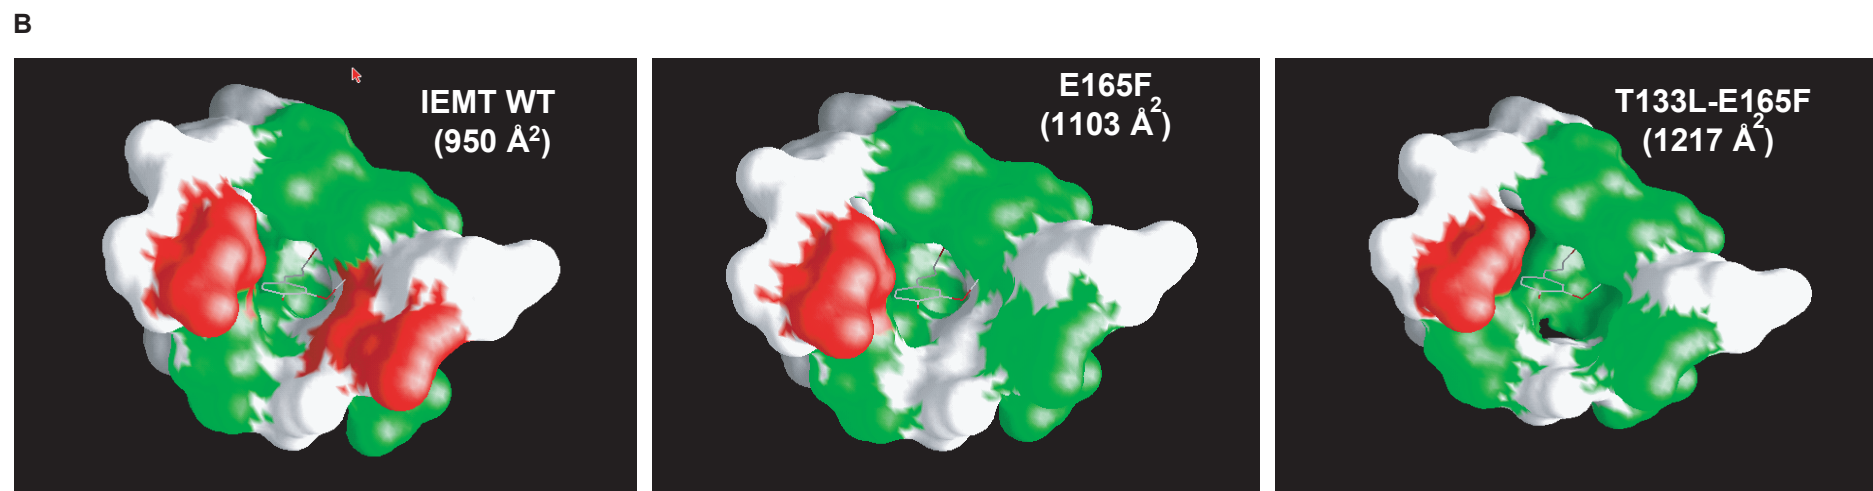

SI Figure 5



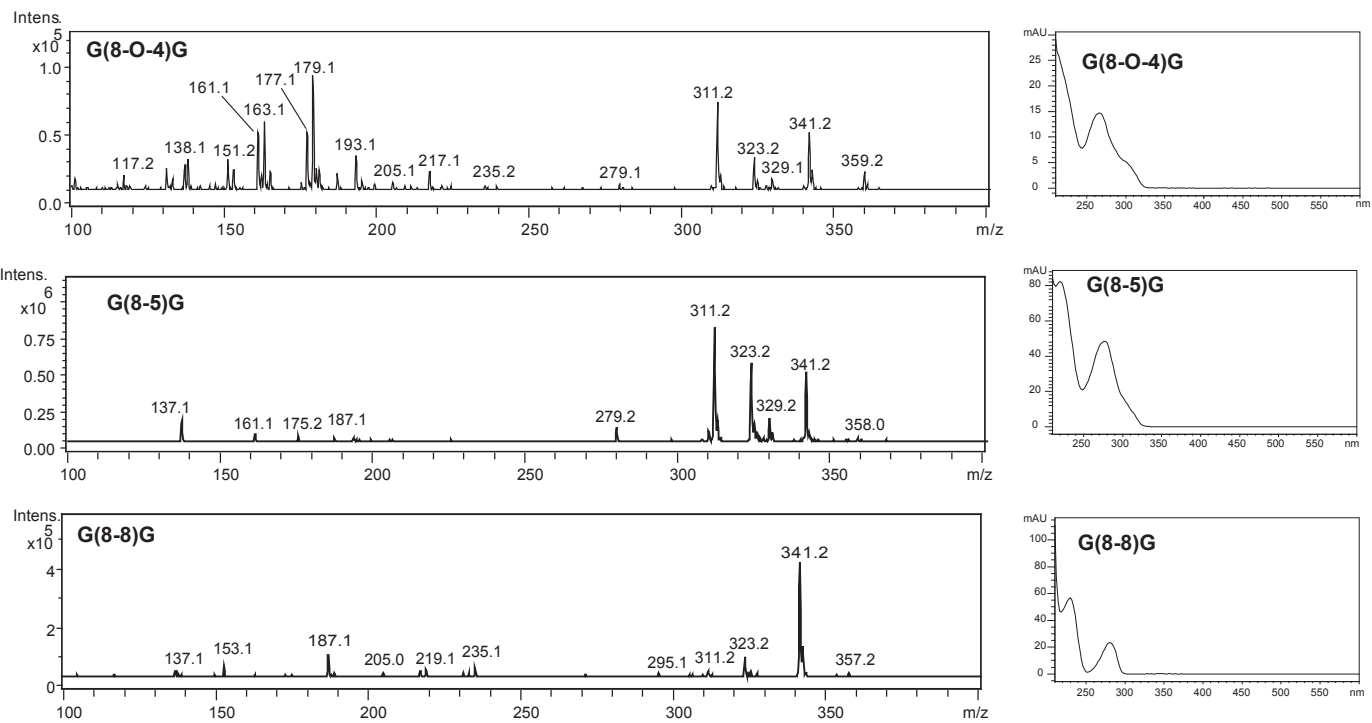

SI Figure 6
